# Supplementary material
Source: MDPI journal article supplement (https://www.mdpi.com/2073-4395/12/10/2498)
Supplement: s1 [file s1]

**Supplementary Table S1A.** The equations for the standard curves, regression coefficient ( $r^2$ ).

| Volatile             | Equation             | Regression coefficient ( $R^2$ ) |
|----------------------|----------------------|----------------------------------|
| Pentadecane          | $Y=0.1123x+0.1701$   | 0,99                             |
| Pentanal             | $y=0.1492x + 0,0122$ | 0,99                             |
| 1-octene             | $Y=0.118x + 0.008$   | 0,99                             |
| Methylheptadecanoate | $Y=0.111x+0.1862$    | 0.99                             |

**Supplementary Table S1B.** The Chemical Abstracts Service (CAS) number for the aroma volatiles detected in cantaloupe and honeydew melons.

| Volatile compounds    | CAS No     |
|-----------------------|------------|
| 2 Heptenal, Z         | 57266-86-1 |
| Benzaldehyde          | 100-52-7   |
| Nonane                | 111-84-2   |
| 4-Methylundec-1-ene   | 13151-29-6 |
| 3 hydroxy-butan-2-one | 513-86-0   |
| Hexadecane            | 544-76-3   |
| Decane                | 124-18-5   |
| Pentadecane           | 629-62-9   |
| 2 methyldecane        | 6975-98-0  |
| 2 methylnonane        | 871-83-0   |
| 4,5-Dimethyl-1-hexene | 16106-59-5 |
| Ethyl butanoate       | 105-54-4   |

|                         |            |
|-------------------------|------------|
| Ethyl hexanoate         | 123-66-0   |
| Hexyl acetate           | 142-92-7   |
| Propyl acetate          | 109-60-4   |
| 2-Methyl propyl acetate | 110-19-0   |
| Methyl acetate          | 79-20-9    |
| Benzyl butanoate        | 103-37-7   |
| 2 ethyl hexyl acetate   | 103-09-3   |
| 2 Nonenal               | 18829-56-6 |

**Supplementary Table S2.** Definition of attributes and reference scales used in the sensory analysis of melons.

| S/N | Attribute              | Description                                                                                                    | References points scale values (0-15)                                                                                   |
|-----|------------------------|----------------------------------------------------------------------------------------------------------------|-------------------------------------------------------------------------------------------------------------------------|
| 1   | <b>Appearance</b>      |                                                                                                                |                                                                                                                         |
|     | Colour                 | Evenness of colour, uniformity and intensity on the sample surface and degree of the dominant colour           | Very irregular: 0; Pale: 0<br>Moderate: 5-6<br>Very even: 15; Saturation: 15 Honeydue : Apple peel, Cantaloupe : carrot |
| 2   | <b>Texture</b>         |                                                                                                                |                                                                                                                         |
|     | Juiciness              | The amount of juice released from the sample when bitten by the incisors                                       | Banana, yellow ripe: 0-1<br>Watermelon: 5-6<br>Over ripe mango pulp: 15                                                 |
|     | Firmness               | The resistant force required to compress the sample on the teeth, prior to smashing into pieces in the mouth.  | Banana, yellow ripe: 0-1<br>Granny Smith apple: 5-6<br>Cucumber with peel : 15                                          |
| 3   | <b>Taste</b>           |                                                                                                                |                                                                                                                         |
|     | Sweetness              | The taste of sweetness (from none to very strong)                                                              | Banana unripe: 0<br>Banana yellow ripe: 5-6<br>Banana over-ripe :15                                                     |
|     | Green taste            | The aroma associated with green cut vegetables (such as cucumber peel, broccoli)                               | Ripe Carrot: 0<br>Mixed green leafy vegetables :15                                                                      |
|     | Fruity                 | The aroma associated with fruity (from none to very strong)                                                    | Absent: 0<br>Dole mixed juice (orange and mango, carrot): 15                                                            |
| 4   | <b>Acceptability</b>   |                                                                                                                |                                                                                                                         |
|     | Overall eating quality | The degree of acceptability (from bad to good) how well the sample is liked in terms of overall eating quality | Universal scale of experiences with muskmelon eaten (Honeydue, watermelon, cantaloupe)                                  |
